# Supplementary material for: The Aquaporin Gene Family of the Yellow Fever Mosquito, Aedes aegypti
Source: PubMed Central journal article supplement (PMC3014591; doi:10.1371/journal.pone.0015578), 2010-12-29
Supplement: pone.0015578.s001.pdf [file pone.0015578.s001.pdf]

Genomic alignment visualization showing sequence identity across a region from position 220 to 610. The top part features a color-coded bar representing identity levels, with a red-to-yellow gradient. Below this, a list of 72 reference sequences (e.g., XP\_319584\_AgAQP1, XP\_972862\_Tc) is aligned with their corresponding amino acid sequences. The sequences are presented in a grid format, with gaps indicated by dashes. The alignment shows high conservation across the species, with some variations in the lower identity regions.
